# Supplementary material
Source: PubMed Central journal article supplement (PMC3504191)
Supplement: NIHMS411555-supplement-1.pdf [file NIHMS411555-supplement-1.pdf]

# **Dynamics of CD4<sup>+</sup> T cell responses against *Listeria monocytogenes***

Frederik Graw<sup>\*</sup>, K. Scott Weber<sup>†</sup>, Paul M. Allen<sup>†</sup>, and Alan  
S. Perelson<sup>\*</sup>

<sup>\*</sup>Los Alamos National Laboratory, Theoretical Biology and Biophysics, MS-K 710, Los  
Alamos NM 87545, U.S.A.

<sup>†</sup>Department of Pathology and Immunology, Washington University School of Medicine,  
St. Louis, MO 63110, U.S.A.

## **Supplemental Material**

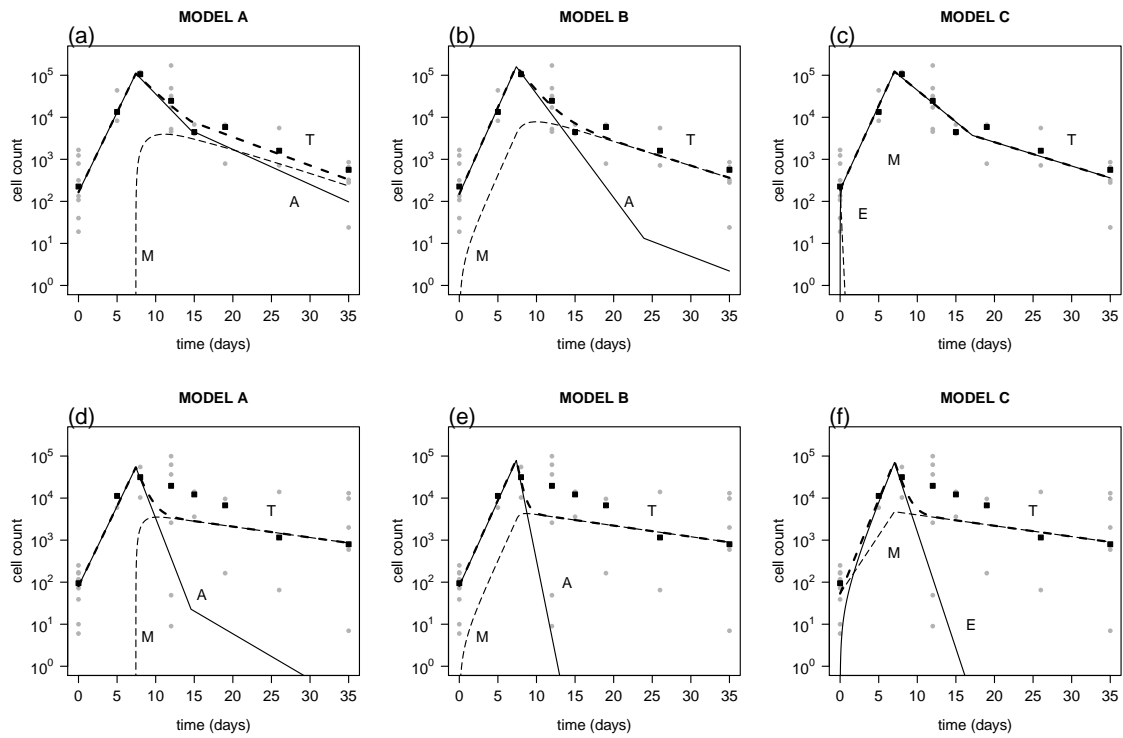

**Figure S1:** Data and fitted curves for the CD4<sup>+</sup> T cell count of LLO118 and LLO56 cells. The separate models correspond to the models explained in Figure 1. In this case, a biphasic contraction phase was assumed in each of the models (see *Materials and Methods*). The total number of CD4<sup>+</sup> T cells ( $T$ , long-dashed line), the number of activated and effector CD4<sup>+</sup> T cells, respectively ( $A$ ,  $E$  solid line) and the number of memory cells ( $M$ , dashed line) are shown.

**Table S1: Parameter estimates for models with rapid apoptosis phase**

| parameter                          | symbol                     | unit              | Model A             | Model B             | Model C |
|------------------------------------|----------------------------|-------------------|---------------------|---------------------|---------|
| Proliferation rate                 | $\rho^{\text{LLO118}}$     | day <sup>-1</sup> | 0.88 [0.85,0.9]     | 0.97 [0.94,0.99]    | 0.92 -  |
|                                    | $\rho^{\text{LLO56}}$      |                   | 0.88 [0.85,0.9]     | 0.97 [0.94,0.99]    | 1.03 -  |
| Memory cell formation              | $r^{\text{LLO118}}$        | day <sup>-1</sup> | 0.028 [0.017,0.037] | 0.024 [0.019,0.027] | 9.88 -  |
|                                    | $r^{\text{LLO56}}$         |                   | 0.084 [0.074,0.093] | 0.035 [0.032,0.039] | 0.39 -  |
| Activated cells at $t = 0$         | $A(0)^{\text{LLO118}}$     | cells             | 165 [156,172]       | 150 [142,157]       | 190 -   |
|                                    | $A(0)^{\text{LLO56}}$      |                   | 80 [75,85]          | 82 [76,88]          | 54 -    |
| Death rate of memory cells         | $\delta_M^{\text{LLO118}}$ | day <sup>-1</sup> | 0.15 [0.14,0.16]    | 0.13 [0.12,0.14]    | 0.11 -  |
|                                    | $\delta_M^{\text{LLO56}}$  |                   | 0.06 [0.05,0.06]    | 0.06 [0.05,0.06]    | 0.06 -  |
| Death rate of activated cells      | $\delta_A$                 | day <sup>-1</sup> | 0.16 -              | 0.14 [0.0,0.35]     | 0.13 -  |
| Fast apoptosis rate                | $\alpha^{\text{LLO118}}$   | day <sup>-1</sup> | 0.24 [0.21,0.27]    | 0.41 [0.18,0.63]    | 0.22 -  |
|                                    | $\alpha^{\text{LLO56}}$    |                   | 0.84 [0.73,0.94]    | 1.92 [1.36,2.48]    | 1.15 -  |
| End of proliferation phase         | $T$                        | day               | 7.4 [7.3,7.5]       | 7.4 [7.2,7.5]       | 7.0     |
| Duration of fast contraction phase | $\Delta$                   | day               | 7.15 [6.39,7.91]    | 16.53 -             | 10.1 -  |
| residual mean square               | MNSQ                       |                   | 3.533               | 3.524               | 3.499   |

Parameter estimates for the basic model ((A), Eqs. (1a) and (1b)), a model with the assumption of a constant memory production during the proliferation phase ((B), Eqs. (4a) and (4b)), and for a model assuming the alternative differentiation pathway ((C), Eqs. (5a) and (5b)). For all models, we assume a biphasic contraction phase for the activated/ effector cells as indicated in Eq. (3). 95% confidence intervals for the estimates are calculated based on the standard error approximated by the Hessian-matrix. MNSQ indicates the residual mean square for each model (see *Materials and Methods* for the calculation).
